# Supplementary material for: Tea polyphenols as a strategy to control starch digestion in bread: the effects of polyphenol type and gluten
Source: Royal Society of Chemistry journal article supplement (doi:10.1039/d0fo01145b), 2020-01-01
Supplement: d0fo01145b1.pdf [file d0fo01145b1.pdf]

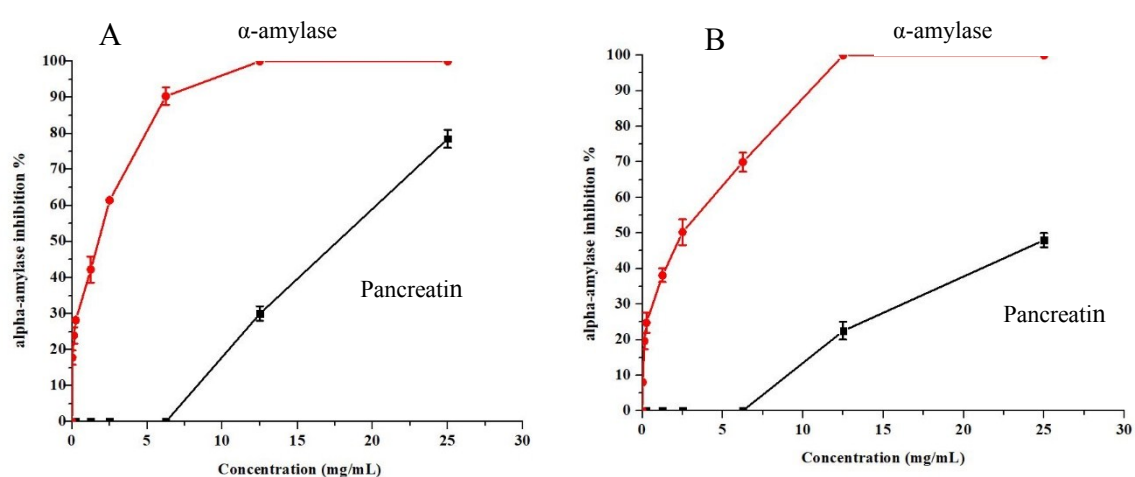

**Figure S1.** Inhibition of GTE (A) and BTE (B) on  $\alpha$ -amylase and pancreatin. GTE, green tea extract; BTE, black tea extract.

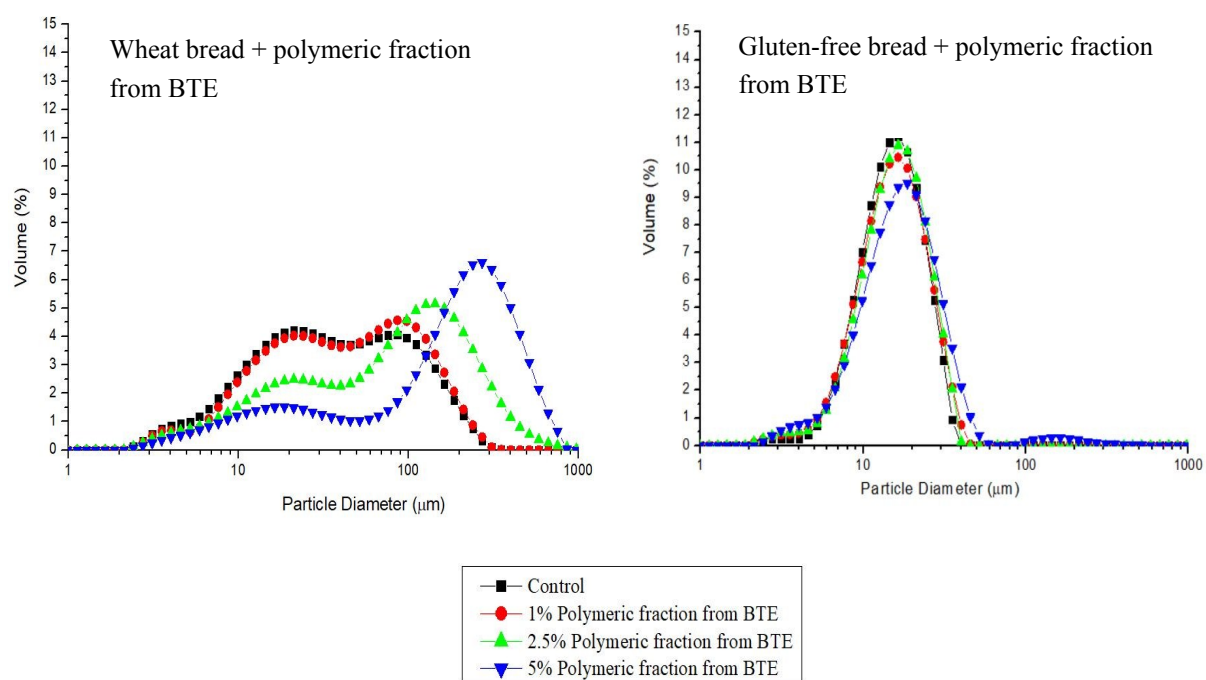

**Figure S2.** The breakdown of the bread matrix after co-digestion with different amount of polymeric fractions: size distribution of the intestinal digested bread samples. Note: 5 g of hydrated wheat bread and gluten-free bread was mixed with 0, 50, 125, 250 mg of polymeric fraction from BTE and marked as control, 1, 2.5 and 5%.
